# Supplementary material for: Transgenic Drosophila to Functionally Validate Fall Armyworm ABCC2 Mutations Conferring Bt Resistance
Source: MDPI journal article supplement (doi:10.3390/toxins15060386), 2023-06-07
Supplement: s1 [file s1]

## SUPPLEMENTARY MATERIAL

**Table S1.** *Drosophila* lines used in this study.

| Strain                                            | Description                                                                                                                                                                                           | Source              |
|---------------------------------------------------|-------------------------------------------------------------------------------------------------------------------------------------------------------------------------------------------------------|---------------------|
| VK13                                              | Expresses phiC31 integrase under the control of <i>vasa</i> . Contains an attP docking site in the 3rd chromosome.                                                                                    | IMBB flyroom stock  |
| HR-GAL4                                           | Bears HR-GAL4 transgene (marked with miniwhite) at P-element insertion site in 2 <sup>nd</sup> chromosome. Drives the reporter gene expression in the larval midgut, Malpighian tubules and fat body. | Daborn et al., 2012 |
| ELAV-GAL4                                         | Neuronal cell-specific driver. Drives the reporter gene expression in embryonic glial cells and mitotically active cells.                                                                             | IMBB flyroom stock  |
| MYO-GAL4                                          | Drives the expression in midgut cells.                                                                                                                                                                |                     |
| <i>yw</i> ; TM3 <i>Sb e</i> / TM6B <i>Tb Hu e</i> | Balancers for 3rd chromosome (TM3 with Stubble marker. TM6B with Tubby and Humoral markers)                                                                                                           |                     |
| UAS_ABCC2                                         | Bears <i>SfABCC2</i> transgene under UAS at the attP insertion point at 3 <sup>rd</sup> chromosome.                                                                                                   | This study          |
| UAS_ABCC2_GYdel                                   | Bears <i>SfABCC2</i> transgene with the GY deletion at position 788-789 under UAS at the attP insertion point at 3 <sup>rd</sup> chromosome.                                                          | This study          |
| UAS_ABCC2_P799K                                   | Bears <i>SfABCC2</i> transgene with the P799K substitution under UAS at the attP insertion point at 3 <sup>rd</sup> chromosome.                                                                       | This study          |
| UAS_ABCC2_combo                                   | Bears a <i>SfABCC2</i> transgene with the GY deletion and the P799K substitution under UAS at the attP insertion point at 3 <sup>rd</sup> chromosome.                                                 | This study          |

**Table S2.** List of primers used in this study.

| Primer name   | 5' sequence 3'          | Use                                 |
|---------------|-------------------------|-------------------------------------|
| ABCC2_F       | GCAAGATGAGCGTGAAGTCC    | Plasmid construction,<br>sequencing |
| ABCC2_R       | ATTCAGGACCAGCACGGAGG    |                                     |
| M13/pUC F     | CCCAGTCACGACGTTGTAAAACG | Plasmid construction                |
| M13/pUC R     | AGCGGATAACAATTTCACACAGG |                                     |
| ABCC2_Seq (F) | ATGCTAATGTGGGACGCCAG    | Sequencing                          |
| ABCC2_WtDel   | AACCAGGTGGACGGCTAC      | Specific screen for<br>integration  |
| ABCC2_P799K   | CCAGAGGGCGAGAGCAAG      |                                     |
| ABCC2_GYdel   | GACCAACCAGGTGGACATTCAG  |                                     |
| 3xP3_RFP_F    | CCAAC TGGGGTAACCTTTGA   | Screen for integration              |
| VK13_R        | ATTCTTTCCGCTGATTGTGC    |                                     |
| SV40_F        | CCCCCTGAACCTGAAACATA    |                                     |

ABCC2\_GYdel

GTACGGTTACCCACCAGATCCACTACCTGAAGGCCGCCGATTTTCATCGTGCTGCTGA  
ATGAGGGCAGCGTGGAAAACATGGGCAGCTACGATGAGCTGATGAAGACCGGCACCG  
AGTTCTCCATGCTGTTGAGTGATCAGGCCAGCGAGGGCTCCGATACCGATAAGAAAG  
AACGCCCAGCCATGATGCGCGGCATCAGCAAGATGAGCGTGAAGTCCGATGATGAAG  
AGGGCGAAGAGAAGGTGCAGGTCCTGGAAGCCGAAGAACGTCAAAGCGGCAGCCTGA  
AGTGGGATGTGTTGGGCCGCTACATGAAGTCCGTGAACTCGTGGTGTATGGTGGTCA  
TGGCCTTTCTGGTGCTGGTCATTACACAGGGTGCCGCCACCACCACCGATTACTGGC  
TGAGCTTCTGGACCAACCAGGTGGACATTCAGACACTGCCAGAGGGCGAGAGCCCCA  
ATCCAGAGTTGAATACCCAAGTGGGCCTGCTGACCACCGGTCGTAC

ABCC2\_P799K

GTACGGTTACCCACCAGATCCACTACCTGAAGGCCGCCGATTTTCATCGTGCTGCTGA  
ATGAGGGCAGCGTGGAAAACATGGGCAGCTACGATGAGCTGATGAAGACCGGCACCG  
AGTTCTCCATGCTGTTGAGTGATCAGGCCAGCGAGGGCTCCGATACCGATAAGAAAG  
AACGCCCAGCCATGATGCGCGGCATCAGCAAGATGAGCGTGAAGTCCGATGATGAAG  
AGGGCGAAGAGAAGGTGCAGGTCCTGGAAGCCGAAGAACGTCAAAGCGGCAGCCTGA  
AGTGGGATGTGTTGGGCCGCTACATGAAGTCCGTGAACTCGTGGTGTATGGTGGTCA  
TGGCCTTTCTGGTGCTGGTCATTACACAGGGTGCCGCCACCACCACCGATTACTGGC  
TGAGCTTCTGGACCAACCAGGTGGACGGCTACATTCAGACACTGCCAGAGGGCGAGAG  
GCAAGAAATCCAGAGTTGAATACCCAAGTGGGCCTGCTGACCACCGGTCGTAC

ABCC2\_GYdel\_P799K

GTACGGTTACCCACCAGATCCACTACCTGAAGGCCGCCGATTTTCATCGTGCTGCTGA  
ATGAGGGCAGCGTGGAAAACATGGGCAGCTACGATGAGCTGATGAAGACCGGCACCG  
AGTTCTCCATGCTGTTGAGTGATCAGGCCAGCGAGGGCTCCGATACCGATAAGAAAG  
AACGCCCAGCCATGATGCGCGGCATCAGCAAGATGAGCGTGAAGTCCGATGATGAAG  
AGGGCGAAGAGAAGGTGCAGGTCCTGGAAGCCGAAGAACGTCAAAGCGGCAGCCTGA  
AGTGGGATGTGTTGGGCCGCTACATGAAGTCCGTGAACTCGTGGTGTATGGTGGTCA  
TGGCCTTTCTGGTGCTGGTCATTACACAGGGTGCCGCCACCACCACCGATTACTGGC  
TGAGCTTCTGGACCAACCAGGTGGACATTCAGACACTGCCAGAGGGCGAGAGCAAGA  
ATCCAGAGTTGAATACCCAAGTGGGCCTGCTGACCACCGGTCGTAC

**Figure S1.** Sequences ordered as gBlocks to be used for the generation of the constructs for *Drosophila* transformation. The GY deletion is colored with green and the P799K substitution is colored with red.
